# Supplementary material for: Reconstruction of the Global Polarity of an Early Spider Embryo by Single-Cell and Single-Nucleus Transcriptome Analysis
Source: Front Cell Dev Biol. 2022 Jul 22;10:933220. doi: 10.3389/fcell.2022.933220 (PMC9353575; doi:10.3389/fcell.2022.933220)
Supplement: Supplementary file 1 [file Table2.XLSX]

## Sheet: TableS2
Table S2. 445 DEGs between two presumptive ectodermal clusters.
Gene ID (NCBI)	p_val	avg_log2FC	pct.1	pct.2	p_val_adj	total molecules*	aug3 gene model	Product (NCBI)
LOC107449537	1.94205e-62	1.38533	1	1	3.51764e-58	62301	aug3.g25692	40S ribosomal protein S25
LOC107456405	3.47326e-62	1.96284	1	0.994	6.29111e-58	39991	aug3.g25230	uncharacterized LOC107456405
LOC107439417	6.24125e-61	1.53119	1	1	1.13048e-56	29674		uncharacterized LOC107439417
LOC107448583	1.75598e-59	0.995745	1	1	3.18061e-55	45136	aug3.g10376	40S ribosomal protein S14a
LOC107455044	9.76005e-58	1.30113	1	1	1.76784e-53	20158	aug3.g6766	probable 60S ribosomal protein L37-A
LOC107446478	1.5739e-56	1.02405	1	1	2.8508e-52	48175	aug3.g19196	60S acidic ribosomal protein P2-like
LOC107449902	9.78455e-56	1.1443	1	1	1.77228e-51	17887	aug3.g15529	40S ribosomal protein S21-like
LOC107452004	1.38371e-55	1.06056	1	1	2.50631e-51	34229	aug3.g23535	40S ribosomal protein S20-like
LOC107443814	2.10195e-55	0.918363	1	1	3.80727e-51	73147	aug3.g17477	60S acidic ribosomal protein P1-like
LOC107437627	4.03192e-55	1.61291	1	0.901	7.30302e-51	6518	aug3.g26304	cyclic AMP-dependent transcription factor ATF-4
LOC107452787	2.5084e-54	1.14342	1	0.971	4.54346e-50	10116	aug3.g4999	prostatic spermine-binding protein
LOC107456917	9.80532e-53	1.04582	1	1	1.77604e-48	18638	aug3.g8939	uncharacterized LOC107456917
LOC107453687	4.90525e-52	1.24902	1	0.889	8.88488e-48	5222	aug3.g23850	small nuclear ribonucleoprotein G
LOC107449194	1.83827e-51	0.985557	1	0.994	3.32966e-47	22507	aug3.g2601	60S ribosomal protein L36-like, transcript variant X1
LOC107454356	3.52463e-51	0.998088	1	1	6.38417e-47	19451	aug3.g6217	60S ribosomal protein L34
LOC107449033	2.49115e-50	0.829461	1	1	4.51222e-46	39141		60S ribosomal protein L26
LOC107452437	4.16569e-49	1.19318	1	0.754	7.54531e-45	2806		uncharacterized LOC107452437
LOC107445247	5.86492e-49	0.855006	1	1	1.06231e-44	38664	aug3.g983	40S ribosomal protein S24-like, transcript variant X1
LOC107439789	1.06229e-48	0.740197	1	1	1.92413e-44	32263	aug3.g14054	40S ribosomal protein S12-like
LOC107442802	6.25136e-48	0.912622	1	0.988	1.13231e-43	15719	aug3.g16835	small ubiquitin-related modifier-like
LOC107456524	8.61508e-48	-0.759136	1	1	1.56045e-43	46826	aug3.g25260	nucleolin-like
LOC107447007	1.14013e-47	0.878207	1	1	2.06512e-43	16280	aug3.g7633	60S ribosomal protein L34-A-like
LOC107436991	2.85551e-47	0.762506	1	1	5.17219e-43	34781	aug3.g11943	40S ribosomal protein S26-like
LOC107454931	9.15597e-47	0.853064	1	0.994	1.65842e-42	17022	aug3.g6691	60S ribosomal protein L31
LOC107437289	3.28276e-46	0.751826	1	1	5.94606e-42	41640	aug3.g12184	60S ribosomal protein L32
LOC107446278	3.89313e-46	0.82307	1	1	7.05162e-42	23609	aug3.g19060	60S ribosomal protein L24
LOC107450488	8.64953e-46	0.864406	1	1	1.56669e-41	25895	aug3.g3364	40S ribosomal protein S17-like
LOC107455337	3.22156e-45	-0.985506	1	1	5.83521e-41	7601	aug3.g7673	eukaryotic translation initiation factor 3 subunit A-like
LOC107444232	7.97433e-45	0.777872	1	1	1.44439e-40	29332	aug3.g17707	60S ribosomal protein L35a, transcript variant X1
LOC107450500	1.89151e-44	1.20551	0.991	0.643	3.42609e-40	2211		uncharacterized LOC107450500
LOC107446258	2.01404e-43	0.803774	1	1	3.64804e-39	14703	aug3.g19042	60S ribosomal protein L27a-like
LOC107441347	1.21389e-42	-0.43539	1	1	2.19873e-38	94317	aug3.g27264	elongation factor 1-alpha
LOC107442608	5.89226e-42	0.727649	1	1	1.06726e-37	20812	aug3.g7300	40S ribosomal protein S23-like
LOC107442666	6.35053e-42	0.860305	1	1	1.15027e-37	20129	aug3.g27712	polyadenylate-binding protein 4-like
LOC107439913	6.45764e-41	1.26966	1	0.988	1.16967e-36	13807		probable 60S ribosomal protein L37-A
LOC107442236	1.41848e-40	0.910563	1	0.971	2.56928e-36	6778	aug3.g9893	10 kDa heat shock protein, mitochondrial-like
LOC107447313	1.72586e-40	1.08107	0.986	0.637	3.12605e-36	2217		uncharacterized LOC107447313
LOC107442204	2.85321e-40	1.07069	1	0.749	5.16802e-36	3278	aug3.g16423	uncharacterized LOC107442204
LOC107437942	3.64087e-40	0.752911	1	1	6.59471e-36	17576	aug3.g12688	60S ribosomal protein L35
LOC107452332	7.29141e-40	0.476172	1	1	1.32069e-35	66817	aug3.g4684	60S ribosomal protein L10-like
LOC107443685	9.64315e-40	1.06222	1	0.883	1.74666e-35	5376	aug3.g17400	histone H4
LOC107438795	1.22651e-38	-0.515754	1	1	2.22159e-34	26615	aug3.g13384	plasminogen activator inhibitor 1 RNA-binding protein-like
LOC107455651	1.26905e-38	1.02439	0.986	0.643	2.29863e-34	1802		uncharacterized LOC107455651
LOC107443910	1.65203e-37	-0.724527	1	1	2.99232e-33	13771	aug3.g17548	heterogeneous nuclear ribonucleoprotein R, transcript variant X2
LOC107443309	7.39723e-37	0.951913	0.995	0.807	1.33986e-32	3414	aug3.g9966	ATP synthase subunit e, mitochondrial-like
LOC107447984	9.69608e-37	0.520801	1	1	1.75625e-32	37723	aug3.g15252	60S ribosomal protein L23
LOC107452706	1.45932e-36	1.0271	1	0.708	2.64327e-32	2501		uncharacterized LOC107452706
LOC107452914	2.1741e-36	0.949567	0.991	0.743	3.93794e-32	2171	aug3.g5072	zinc finger protein 706
LOC107447512	5.1508e-36	0.610518	1	1	9.32964e-32	27569	aug3.g19800	60S ribosomal protein L28
LOC107441541	5.51991e-36	-0.762238	1	1	9.99821e-32	22505	aug3.g27317	cyclin-dependent kinase 10
LOC107439467	8.35606e-36	0.488581	1	1	1.51353e-31	43224	aug3.g26800	ubiquitin-40S ribosomal protein S27a, transcript variant X1
LOC107439360	2.21253e-35	0.82768	1	0.947	4.00755e-31	5876	aug3.g13715	cytochrome c
LOC107445672	2.42669e-35	-0.609682	1	1	4.39545e-31	25372	aug3.g1134	zinc finger protein on ecdysone puffs
LOC110282061	2.62868e-35	-0.695136	1	1	4.76132e-31	72376		cytochrome c oxidase subunit 1-like
LOC107452096	3.34043e-35	-0.36379	1	1	6.05053e-31	46609	aug3.g4511	60S ribosomal protein L4-A
LOC107445298	5.20764e-35	0.538406	1	1	9.43259e-31	39065	aug3.g18447	eukaryotic translation initiation factor 5A-1
LOC107443537	5.26572e-35	0.8561	1	0.965	9.53779e-31	5936	aug3.g471	uncharacterized LOC107443537, transcript variant X5
LOC107445859	5.76852e-35	0.594385	1	1	1.04485e-30	12798	aug3.g22695	NHP2-like protein 1 homolog
LOC107453011	1.12607e-34	0.591102	1	1	2.03965e-30	27072	aug3.g5142	60S ribosomal protein L23a-like
LOC107446816	1.60222e-34	0.811114	1	0.889	2.9021e-30	4048	aug3.g19406	activated RNA polymerase II transcriptional coactivator p15-like, transcript variant X1
LOC107456959	2.90393e-34	-0.869971	1	1	5.25989e-30	7609	aug3.g25336	cell growth-regulating nucleolar protein, transcript variant X3
LOC107446560	3.286e-34	0.510716	1	1	5.95193e-30	43659	aug3.g1382	40S ribosomal protein S13, transcript variant X1
LOC107450560	5.134e-34	0.886235	1	0.871	9.29922e-30	3254	aug3.g3422	26S proteasome complex subunit SEM1
LOC107436592	6.29547e-34	-0.659682	1	1	1.1403e-29	10875	aug3.g11685	uncharacterized NOP5 family protein K07C5.4
LOC107440173	6.33078e-34	-0.744193	1	1	1.14669e-29	8213	aug3.g14312	protein lingerer-like, transcript variant X1
LOC107446088	8.32409e-34	0.887727	0.991	0.86	1.50774e-29	3230		uncharacterized LOC107446088
LOC107457378	1.12498e-33	-0.537657	1	1	2.03769e-29	37085	aug3.g11106	elongation factor 2
LOC107448998	1.64234e-33	-0.611039	1	1	2.97477e-29	113377	aug3.g20563	cytochrome c oxidase subunit 3-like
LOC107450229	9.49318e-33	0.839313	1	0.871	1.7195e-28	3029	aug3.g3228	trafficking protein particle complex subunit 2-like protein, transcript variant X2
LOC107450412	9.94064e-33	0.494903	1	1	1.80055e-28	48340	aug3.g3311	60S ribosomal protein L14
LOC107446237	1.50592e-32	0.769986	1	0.942	2.72768e-28	4570	aug3.g1280	eukaryotic translation initiation factor 1
LOC107454645	1.51602e-32	-0.826548	1	1	2.74596e-28	11666	aug3.g24080	nucleolar and coiled-body phosphoprotein 1-like, transcript variant X1
LOC107452288	4.63534e-32	-0.767993	0.995	1	8.396e-28	7666	aug3.g23571	lupus La protein homolog
LOC107442014	1.65129e-31	-0.792526	0.995	0.994	2.99098e-27	5025	aug3.g27502	serine/arginine repetitive matrix protein 1-like
LOC107440774	3.71969e-31	0.789657	1	0.865	6.73747e-27	3757	aug3.g14813	cytochrome c oxidase subunit 6A1, mitochondrial-like
LOC107450898	4.55139e-31	0.879787	0.991	0.749	8.24393e-27	2373	aug3.g3687	uncharacterized LOC107450898
LOC107450979	5.06212e-31	-0.461141	1	1	9.16901e-27	23940	aug3.g3748	RNA-binding protein cabeza, transcript variant X1
LOC107448507	1.40538e-30	-0.498861	1	1	2.54557e-26	18962	aug3.g2253	eukaryotic initiation factor 4A-I-like
LOC107447021	2.0679e-30	0.623634	1	0.994	3.74558e-26	14695	aug3.g7601	histone H2A
LOC107448144	2.2384e-30	-0.689657	1	1	4.05442e-26	6361	aug3.g20156	probable 28S rRNA (cytosine(4447)-C(5))-methyltransferase
LOC107449006	2.91393e-30	0.52451	1	1	5.27801e-26	22442	aug3.g2540	40S ribosomal protein S18
LOC107446089	2.99613e-30	0.745472	0.995	0.889	5.42688e-26	2930		60S ribosomal protein L44
LOC107456964	4.62082e-30	0.793448	0.991	0.865	8.36969e-26	3231	aug3.g25343	cytochrome c oxidase subunit 6B1, transcript variant X1
LOC107442325	9.5366e-30	-0.585518	1	1	1.72736e-25	9126	aug3.g16513	heterogeneous nuclear ribonucleoprotein F-like
LOC107455202	9.5366e-30	0.476071	1	1	1.72736e-25	26136	aug3.g6897	40S ribosomal protein S19-like
LOC107438439	1.76362e-29	0.869415	1	1	3.19444e-25	11482		60S ribosomal protein L30
LOC107441435	1.90929e-29	0.773502	0.995	0.83	3.4583e-25	2616	aug3.g15900	cytochrome b-c1 complex subunit 8-like
LOC107457026	2.78493e-29	0.784561	0.995	0.883	5.04435e-25	3896	aug3.g9024	ubiquitin-conjugating enzyme E2 variant 2, transcript variant X1
LOC107450742	4.8658e-29	0.58847	1	1	8.81343e-25	17325	aug3.g21298	40S ribosomal protein S15-like
LOC107451678	2.02464e-28	-0.741789	1	1	3.66722e-24	10302	aug3.g4219	ras GTPase-activating protein-binding protein 2, transcript variant X2
LOC107449491	2.5715e-28	0.752761	0.991	0.842	4.65775e-24	2880	aug3.g25681	ATP synthase subunit g, mitochondrial-like
LOC107438637	3.16858e-28	0.610644	1	0.977	5.73925e-24	6425	aug3.g13247	coiled-coil-helix-coiled-coil-helix domain-containing protein 2-like
LOC107437042	4.0637e-28	0.529006	1	1	7.36058e-24	17712	aug3.g26162	ATP synthase lipid-binding protein, mitochondrial-like
LOC107442731	5.05292e-28	-0.496704	1	1	9.15235e-24	15600	aug3.g27728	heterogeneous nuclear ribonucleoprotein A1, A2/B1 homolog, transcript variant X1
LOC107449999	6.21127e-28	0.720884	0.995	0.877	1.12505e-23	3645	aug3.g3085	cytochrome c oxidase subunit 5B, mitochondrial-like
LOC107440487	1.00395e-27	-0.574075	1	1	1.81845e-23	26427	aug3.g27068	heat shock 70 kDa protein cognate 4
LOC107449508	1.38311e-27	0.845977	1	0.936	2.50523e-23	5418	aug3.g15449	histone H2A.Z-specific chaperone CHZ1, transcript variant X3
LOC107437789	2.14847e-27	0.790466	0.968	0.602	3.89153e-23	1454	aug3.g12583	uncharacterized LOC107437789
LOC107446721	3.49375e-27	-0.534495	1	1	6.32823e-23	9183	aug3.g19338	46 kDa FK506-binding nuclear protein
LOC107445463	7.07287e-27	0.729044	1	0.971	1.28111e-22	6182	aug3.g18563	histone H2A.V
LOC107453076	7.25102e-27	0.560702	1	0.988	1.31338e-22	10698	aug3.g21870	40S ribosomal protein S23-like
LOC107443600	7.39615e-27	-0.713885	0.995	1	1.33966e-22	7178	aug3.g7367	chromodomain-helicase-DNA-binding protein Mi-2 homolog, transcript variant X3
LOC110282023	1.52494e-26	0.692623	0.838	0.287	2.76213e-22	701	aug3.g10574	histone H1.M6.2-like
LOC107449980	1.74615e-26	0.731119	1	0.877	3.1628e-22	3817	aug3.g3056	12 kDa FK506-binding protein-like
LOC107455555	2.02195e-26	0.405445	1	1	3.66236e-22	51088	aug3.g7845	40S ribosomal protein S8
LOC107450216	2.18483e-26	0.731182	0.995	0.678	3.95739e-22	2018	aug3.g17834	protein transport protein Sec61 subunit beta-like, transcript variant X1
LOC107456988	3.26778e-26	-0.535441	1	1	5.91893e-22	9031	aug3.g25840	eukaryotic peptide chain release factor GTP-binding subunit ERF3A-like
LOC107444026	5.8095e-26	-0.758112	0.995	1	1.05228e-21	3004	aug3.g7427	pre-mRNA-processing factor 40 homolog B-like
LOC107444512	6.92026e-26	-0.605151	1	1	1.25347e-21	6437	aug3.g17924	T-complex protein 1 subunit gamma-like
LOC107457376	7.55212e-26	-0.762008	1	1	1.36792e-21	6547	aug3.g11104	piwi-like protein 1
LOC107456286	7.62586e-26	-0.667588	1	1	1.38127e-21	5133	aug3.g8464	glyoxylate/succinic semialdehyde reductase 1-like, transcript variant X4
LOC107456860	8.6254e-26	0.760002	0.843	0.345	1.56232e-21	864	aug3.g8888	uncharacterized LOC107456860
LOC107445015	1.80285e-25	-0.636572	1	1	3.2655e-21	7867	aug3.g18277	DNA topoisomerase I, mitochondrial-like
LOC107445656	2.73695e-25	0.723649	1	0.895	4.95744e-21	4131	aug3.g18673	elongin-B
LOC107447866	2.8733e-25	0.580543	1	1	5.20441e-21	8690	aug3.g1955	histone H3.3, transcript variant X2
LOC107456134	4.09275e-25	0.749251	0.88	0.386	7.4132e-21	905		uncharacterized LOC107456134
LOC107441101	6.97645e-25	0.622919	0.995	0.942	1.26364e-20	3517	aug3.g15035	small nuclear ribonucleoprotein Sm D1
LOC107440103	9.73987e-25	-0.55698	1	1	1.76418e-20	8948	aug3.g14265	probable ATP-dependent RNA helicase DDX5
LOC107451256	1.77573e-24	-0.530777	1	1	3.21639e-20	9788	aug3.g3887	insulin-like growth factor 2 mRNA-binding protein 3, transcript variant X1
LOC107455604	1.84399e-24	0.556189	1	0.994	3.34002e-20	10449	aug3.g7904	uncharacterized LOC107455604, transcript variant X1
LOC107456514	2.44587e-24	0.383258	1	1	4.43021e-20	39166	aug3.g25255	60S ribosomal protein L12-like
LOC107447864	2.96533e-24	0.438208	1	1	5.37109e-20	23265	aug3.g1970	40S ribosomal protein S15Aa
LOC107444485	3.21152e-24	-0.503464	1	1	5.81703e-20	10153	aug3.g24290	far upstream element-binding protein 1
LOC107448932	3.29749e-24	0.729706	0.968	0.69	5.97275e-20	1786	aug3.g20527	huntingtin-interacting protein K-like
LOC107441500	3.98553e-24	0.752836	0.972	0.825	7.21899e-20	2421	aug3.g15958	probable small nuclear ribonucleoprotein F
LOC107449675	5.22439e-24	0.377497	1	1	9.46293e-20	35606	aug3.g20869	40S ribosomal protein S7-like, transcript variant X1
LOC107440150	8.17028e-24	0.347996	1	1	1.47988e-19	47541	aug3.g26992	60S ribosomal protein L18
LOC107444948	1.53149e-23	0.597094	1	0.924	2.77399e-19	5102	aug3.g875	endothelial differentiation-related factor 1 homolog
LOC107449815	2.27161e-23	0.725973	0.986	0.772	4.11456e-19	2327	aug3.g2970	uncharacterized LOC107449815
LOC107452424	3.64374e-23	-0.67361	0.995	1	6.59991e-19	3118	aug3.g21739	importin subunit alpha-1, transcript variant X2
LOC107440251	9.9305e-23	0.581159	1	0.965	1.79871e-18	3916	aug3.g14387	small nuclear ribonucleoprotein E-like
LOC107456459	1.25662e-22	0.665806	1	0.895	2.27612e-18	3146	aug3.g8583	small nuclear ribonucleoprotein F-like
LOC107436872	1.78823e-22	0.67241	0.995	0.83	3.23903e-18	2379	aug3.g11889	mitochondrial import inner membrane translocase subunit Tim13-like
LOC107445891	1.87034e-22	0.450574	1	1	3.38775e-18	22716	aug3.g18827	ubiquitin-60S ribosomal protein L40
LOC107438009	2.19814e-22	-0.757515	0.977	0.977	3.9815e-18	2874	aug3.g12732	poly [ADP-ribose] polymerase 1-like
LOC107452729	2.38295e-22	0.578756	1	0.942	4.31623e-18	3505	aug3.g4945	peptidyl-prolyl cis-trans isomerase FKBP12-like, transcript variant X1
LOC107436109	2.90588e-22	-0.345329	1	1	5.26342e-18	20178	aug3.g11323	heterogeneous nuclear ribonucleoprotein A1, A2/B1 homolog
LOC107450368	3.87063e-22	0.456373	1	1	7.01088e-18	21767	aug3.g3285	60S ribosomal protein L22-like
LOC107449732	5.33824e-22	-0.650636	0.995	0.988	9.66915e-18	4093	aug3.g15488	synaptic vesicle membrane protein VAT-1 homolog-like
LOC107456160	5.45862e-22	-0.545094	1	1	9.88721e-18	7019	aug3.g340	eukaryotic translation initiation factor 3 subunit B
LOC107443684	2.01865e-21	1.26952	0.995	0.848	3.65638e-17	6340	aug3.g17399	histone H2A
LOC107455103	2.16116e-21	0.416675	1	1	3.9145e-17	29653	aug3.g10850	60S ribosomal protein L21-like
LOC107445410	2.46274e-21	0.588927	1	0.936	4.46076e-17	3565	aug3.g1036	putative ATP synthase subunit f, mitochondrial
LOC107447211	2.48703e-21	-0.279901	1	1	4.50477e-17	57332	aug3.g1657	heterogeneous nuclear ribonucleoprotein D-like, transcript variant X1
LOC107442215	2.72682e-21	-0.595099	1	1	4.93909e-17	4919	aug3.g27573	serine/threonine-protein phosphatase 2A 65 kDa regulatory subunit A alpha isoform
LOC107436493	3.46879e-21	0.515842	1	0.994	6.28301e-17	15784	aug3.g22922	60S ribosomal protein L27-like, transcript variant X1
LOC107441078	3.59216e-21	0.508104	1	0.988	6.50647e-17	10150		60S ribosomal protein L27
LOC107450983	5.00355e-21	0.303393	1	1	9.06294e-17	50641	aug3.g21375	60S ribosomal protein L11
LOC107456511	5.00355e-21	-0.445346	1	1	9.06294e-17	13230		uncharacterized LOC107456511
LOC107452817	8.94885e-21	0.507539	1	0.988	1.6209e-16	16165	aug3.g23679	RNA-binding protein Rsf1
LOC107452179	9.84166e-21	-0.284937	1	1	1.78262e-16	34322	aug3.g4576	protein SET
LOC107453795	1.29704e-20	-0.645122	1	0.982	2.34932e-16	4434	aug3.g23907	polypyrimidine tract-binding protein 1
LOC107456598	1.40158e-20	-0.539827	1	1	2.53869e-16	6322	aug3.g8686	nucleolar protein 58-like
LOC107448885	2.33837e-20	0.591029	1	0.906	4.23549e-16	3250	aug3.g15381	small nuclear ribonucleoprotein Sm D3
LOC107452117	2.49023e-20	-0.638986	0.995	1	4.51055e-16	4313	aug3.g10635	scaffold attachment factor B1-like
LOC107449162	2.76887e-20	0.662734	0.991	0.83	5.01526e-16	2730	aug3.g15401	uncharacterized LOC107449162
LOC107452965	3.14498e-20	0.477141	0.662	0.152	5.6965e-16	431		uncharacterized LOC107452965
LOC107440339	3.24481e-20	-0.518885	1	1	5.87733e-16	7389		eukaryotic translation initiation factor 4 gamma 3
LOC107436425	3.53338e-20	-0.597366	0.991	0.994	6.40002e-16	5377	aug3.g11556	insulin-like growth factor 2 mRNA-binding protein 1, transcript variant X3
LOC107451758	4.38023e-20	0.579981	1	0.778	7.93391e-16	1911	aug3.g4277	prefoldin subunit 2-like
LOC107447354	4.56041e-20	-0.370611	1	1	8.26027e-16	30148	aug3.g19712	tubulin alpha-1 chain
LOC107454525	6.79123e-20	-0.524968	0.995	1	1.2301e-15	3786	aug3.g6350	regulator of chromosome condensation
LOC107453315	9.3189e-20	-0.630407	0.995	0.994	1.68793e-15	4413	aug3.g5397	extracellular serine/threonine protein CG31145
LOC107454534	1.1943e-19	0.426025	1	0.994	2.16324e-15	16345	aug3.g6355	60S ribosomal protein L15
LOC107441581	1.26212e-19	0.607019	0.931	0.497	2.28608e-15	1001	aug3.g27344	glutaredoxin-related protein 5, mitochondrial
LOC107445993	1.34319e-19	0.291731	1	1	2.43292e-15	82214	aug3.g18870	60S ribosomal protein L19-like
LOC107441824	1.40541e-19	0.605845	0.894	0.456	2.54562e-15	869	aug3.g16167	high mobility group protein HMG-I/HMG-Y-like
LOC107436782	2.87131e-19	0.491029	1	1	5.20081e-15	9708	aug3.g9473	histone H3.3
LOC107440458	3.56288e-19	-0.612883	1	0.994	6.45344e-15	4078	aug3.g14557	transcription elongation regulator 1-like, transcript variant X1
LOC107437752	3.90089e-19	0.491515	0.995	0.953	7.06568e-15	5251	aug3.g12547	eukaryotic translation initiation factor 1A, X-chromosomal-like
LOC107451752	4.54825e-19	-0.629811	0.995	1	8.23824e-15	4908	aug3.g4278	RNA-binding protein 25-like, transcript variant X4
LOC107452315	4.95999e-19	0.493562	1	0.971	8.98403e-15	8358	aug3.g21706	ubiquitin-like protein FUBI
LOC107442167	5.23377e-19	0.372945	1	1	9.47993e-15	17376	aug3.g16394	transcription factor BTF3 homolog 4-like, transcript variant X1
LOC107441110	1.16542e-18	-0.680958	1	1	2.11092e-14	4699	aug3.g15050	eukaryotic translation initiation factor 3 subunit C
LOC107452306	1.23399e-18	-0.454059	1	1	2.23513e-14	8765	aug3.g4663	T-complex protein 1 subunit alpha
LOC107436841	1.33577e-18	0.535733	0.745	0.269	2.41948e-14	546		uncharacterized LOC107436841
LOC107456764	1.38895e-18	-0.293008	1	1	2.5158e-14	25128	aug3.g8823	rRNA 2'-O-methyltransferase fibrillarin-like
LOC107439419	1.5631e-18	-0.575487	1	1	2.83124e-14	3985	aug3.g13763	pre-rRNA processing protein FTSJ3-like
LOC107439814	1.86171e-18	-0.59459	1	1	3.37212e-14	4749	aug3.g26911	eukaryotic translation initiation factor 4B-like, transcript variant X1
LOC107438710	2.18969e-18	0.58392	0.861	0.392	3.96619e-14	878	aug3.g13310	transmembrane protein 183-like, transcript variant X1
LOC107453126	2.56433e-18	-0.580113	0.995	0.994	4.64477e-14	3747	aug3.g5231	pumilio homolog 3-like
LOC107447820	2.87162e-18	-0.511735	1	1	5.20136e-14	5363	aug3.g20001	guanine nucleotide-binding protein-like 3 homolog
LOC107450901	2.93252e-18	-0.672808	0.94	0.977	5.31168e-14	1872	aug3.g3693	pre-mRNA-processing factor 39, transcript variant X1
LOC107446716	3.42948e-18	0.339218	1	1	6.21182e-14	44238	aug3.g19334	peptidyl-prolyl cis-trans isomerase
LOC107441752	3.65781e-18	-0.342488	1	1	6.62539e-14	33745	aug3.g16084	elongation factor 1-gamma
LOC107439613	4.26194e-18	-0.295844	1	1	7.71966e-14	26259	aug3.g13912	nucleosome assembly protein 1-like 1
LOC107442599	5.26059e-18	0.57379	1	0.912	9.52851e-14	3348	aug3.g25546	uncharacterized LOC107442599
LOC107443363	9.03985e-18	-0.337043	1	1	1.63739e-13	10682	aug3.g17173	proliferation-associated protein 2G4
LOC107436998	9.33226e-18	-0.35963	1	1	1.69035e-13	12438	aug3.g18575	T-complex protein 1 subunit beta-like
LOC107454106	9.63395e-18	0.367611	1	1	1.745e-13	27873	aug3.g6035	40S ribosomal protein S16
LOC107456155	1.3445e-17	-0.537119	1	1	2.4353e-13	9538	aug3.g358	heat shock 70 kDa protein F, mitochondrial-like
LOC107442270	1.38229e-17	-0.417199	1	1	2.50374e-13	15824	aug3.g9894	60 kDa heat shock protein, mitochondrial-like, transcript variant X1
LOC107442472	1.48427e-17	0.520067	0.685	0.24	2.68846e-13	500	aug3.g16609	uncharacterized LOC107442472
LOC107447372	1.51736e-17	0.533924	0.778	0.333	2.7484e-13	700	aug3.g1717	uncharacterized LOC107447372
LOC107438325	1.54859e-17	0.53293	1	0.93	2.80497e-13	3318	aug3.g12993	small nuclear ribonucleoprotein Sm D3
LOC107448689	2.12533e-17	-0.568627	0.995	0.994	3.84961e-13	3822	aug3.g2351	kelch domain-containing protein 4-like
LOC107449398	2.24566e-17	-0.567704	0.995	0.994	4.06756e-13	3835	aug3.g10455	importin-7
LOC107447334	2.35417e-17	-0.632455	1	1	4.2641e-13	43445	aug3.g1688	elongation factor 1-alpha
LOC107452518	2.79801e-17	0.441777	1	0.994	5.06804e-13	6761	aug3.g442	H/ACA ribonucleoprotein complex subunit 2-like protein
LOC107445695	2.8098e-17	0.534645	1	0.895	5.08939e-13	2741	aug3.g18689	ubiquitin-like protein FUBI
LOC107452900	3.59459e-17	0.33226	1	1	6.51087e-13	16973	aug3.g5053	60S ribosomal protein L17
LOC107456440	3.82639e-17	-0.560316	0.995	1	6.93075e-13	7947	aug3.g8563	failed axon connections-like
LOC107436162	3.96928e-17	0.557099	0.968	0.661	7.18956e-13	1431	aug3.g25961	PEST proteolytic signal-containing nuclear protein-like
LOC107449489	4.79722e-17	-0.475296	1	1	8.68921e-13	7725	aug3.g20793	non-POU domain-containing octamer-binding protein
LOC107453160	5.78133e-17	-0.510203	1	1	1.04717e-12	7956	aug3.g5265	A-kinase anchor protein 1, mitochondrial, transcript variant X1
LOC107444162	6.03919e-17	1.05807	0.954	0.854	1.09388e-12	5723	aug3.g24527	histone H2B
LOC107436306	6.99103e-17	-0.521303	1	1	1.26628e-12	5159	aug3.g11452	eukaryotic peptide chain release factor subunit 1
LOC107447028	7.89207e-17	0.536657	1	0.871	1.42949e-12	2658	aug3.g7602	DNA-directed RNA polymerases I, II, and III subunit RPABC3
LOC107451734	8.25612e-17	-0.576717	1	1	1.49543e-12	4232	aug3.g4261	caprin-1
LOC107447464	9.0059e-17	0.463164	0.704	0.24	1.63124e-12	465	aug3.g1772	HIG1 domain family member 1C-like, transcript variant X1
LOC107455161	9.06407e-17	-0.733059	0.894	0.965	1.64177e-12	1981	aug3.g6881	DNA topoisomerase 2-alpha
LOC107443075	1.61205e-16	-0.408475	1	1	2.9199e-12	6032	aug3.g7343	trifunctional purine biosynthetic protein adenosine-3-like
LOC107444161	1.86498e-16	0.685031	0.736	0.304	3.37804e-12	822	aug3.g24526	histone H2A
LOC107440262	2.2687e-16	0.523776	0.921	0.62	4.1093e-12	1088	aug3.g14397	NADH dehydrogenase [ubiquinone] 1 beta subcomplex subunit 3
LOC107444982	2.536e-16	0.567659	0.69	0.234	4.59346e-12	656	aug3.g18241	matrilin-2-like
LOC107440266	2.57258e-16	0.525907	0.819	0.392	4.65972e-12	748	aug3.g14402	ARL14 effector protein-like
LOC107436222	2.64679e-16	-0.295399	1	1	4.79414e-12	15460	aug3.g11400	ATP-dependent RNA helicase DDX39A-like
LOC107443687	2.79695e-16	0.576424	0.968	0.667	5.06612e-12	1590	aug3.g17398	histone H2B
LOC107456994	2.97656e-16	-0.595225	0.972	0.988	5.39144e-12	3050	aug3.g8983	ribosome biogenesis protein BMS1 homolog
LOC107439000	3.02289e-16	-0.533294	0.995	0.982	5.47537e-12	3760	aug3.g26627	peptidyl-prolyl cis-trans isomerase FKBP4
LOC107449304	5.22853e-16	-0.572892	0.995	0.988	9.47043e-12	3383	aug3.g10448	innexin inx2-like
LOC107443727	5.89937e-16	-0.698059	0.847	0.93	1.06855e-11	1336		eukaryotic translation initiation factor 3 subunit C-like
LOC107440983	7.49551e-16	-0.554927	0.968	1	1.35766e-11	2787	aug3.g14919	methyl-CpG-binding protein 2-like
LOC107438007	7.9002e-16	-0.586487	0.991	1	1.43096e-11	3470	aug3.g9573	zinc finger RNA-binding protein
LOC107448034	8.32485e-16	-0.564731	1	0.994	1.50788e-11	4366	aug3.g20098	ATP-binding cassette sub-family F member 2
LOC107452258	9.75013e-16	0.519634	0.843	0.556	1.76604e-11	833	aug3.g21701	NEDD8
LOC107436263**	1.00338e-15	0.54824	0.907	0.532	1.81743e-11	1041	aug3.g25992	cyclin-dependent kinases regulatory subunit-like
LOC107441975	1.17885e-15	0.542807	0.972	0.766	2.13526e-11	2003	aug3.g7245	soma ferritin-like
LOC107455987	1.24966e-15	-0.529379	1	0.994	2.26352e-11	3635	aug3.g25160	stress-induced-phosphoprotein 1-like
LOC107453040	1.46587e-15	-0.475055	1	1	2.65514e-11	9079	aug3.g5162	probable ATP-dependent RNA helicase DDX4
LOC107450697	1.5942e-15	0.520002	0.995	0.86	2.88757e-11	2398	aug3.g3538	probable nuclear transport factor 2
LOC107451191	2.13453e-15	-0.596348	0.963	0.971	3.86627e-11	2458	aug3.g10566	RRP12-like protein
LOC107438959	2.38673e-15	-0.475565	0.986	1	4.32308e-11	3055	aug3.g13490	U1 small nuclear ribonucleoprotein 70 kDa
LOC107445098	2.47619e-15	-0.508575	1	1	4.48512e-11	13103	aug3.g920	protein PRRC2C, transcript variant X1
LOC107447633	2.76473e-15	0.377962	1	1	5.00776e-11	8623	aug3.g1839	eukaryotic translation initiation factor 3 subunit J
LOC107456774	3.07217e-15	0.421863	0.995	0.936	5.56462e-11	3614	aug3.g8817	mitochondrial import receptor subunit TOM22 homolog
LOC107457198	3.25307e-15	0.445437	0.796	0.345	5.89228e-11	615	aug3.g9178	signal recognition particle 14 kDa protein-like
LOC107447705	3.32094e-15	-0.416167	1	1	6.01522e-11	7550	aug3.g1884	T-complex protein 1 subunit delta
LOC107442846	4.44751e-15	0.999329	1	0.965	8.05577e-11	18276		histone H4
LOC107439706	5.77769e-15	0.527715	0.833	0.474	1.04651e-10	857	aug3.g13985	probable splicing factor 3B subunit 5
LOC107452384	6.35102e-15	-0.334473	1	1	1.15036e-10	13754	aug3.g4723	tubulin beta chain
LOC107442528	6.74607e-15	0.492337	0.847	0.456	1.22191e-10	808	aug3.g16650	DPH3 homolog
LOC107454093	6.98176e-15	0.497945	0.991	0.906	1.26461e-10	2904	aug3.g6006	RING-box protein 1A
LOC107436752	9.18164e-15	-0.444546	1	1	1.66307e-10	4455	aug3.g11812	guanine nucleotide-binding protein-like 3 homolog
LOC107443325	9.68561e-15	0.550978	0.954	0.702	1.75436e-10	1472	aug3.g17158	FK506-binding protein 4
LOC107454367	1.0941e-14	0.497666	0.926	0.637	1.98174e-10	1084	aug3.g6226	nuclear cap-binding protein subunit 2-like, transcript variant X2
LOC107454651	1.10702e-14	-0.539426	0.981	1	2.00515e-10	3434	aug3.g24099	FACT complex subunit SPT16-like
LOC107436238	1.1255e-14	-0.570006	0.958	0.971	2.03862e-10	1917	aug3.g11410	PE-PGRS family protein PE_PGRS16-like
LOC107442392	1.26029e-14	0.373651	0.556	0.14	2.28277e-10	301		uncharacterized LOC107442392
LOC107444492	1.54371e-14	0.491553	0.968	0.778	2.79613e-10	1743	aug3.g730	multifunctional methyltransferase subunit TRM112-like protein
LOC107447628	1.56826e-14	0.720528	0.917	0.673	2.84058e-10	1869	aug3.g1840	pleckstrin homology domain-containing family O member 1-A, transcript variant X1
LOC107436574	2.01188e-14	0.744767	0.921	0.678	3.64412e-10	1802	aug3.g11670	histone H2B-like
LOC107455398	2.0693e-14	0.401567	1	0.994	3.74813e-10	6447	aug3.g7728	deoxyuridine 5'-triphosphate nucleotidohydrolase-like
LOC107446248	2.18265e-14	-0.467969	1	1	3.95344e-10	5448	aug3.g19032	ubiquitin-like modifier-activating enzyme 1
LOC110281958	2.24554e-14	-0.558278	0.986	1	4.06735e-10	3615		cytochrome c oxidase subunit 1-like
LOC107452658	2.5958e-14	-0.55648	0.968	0.982	4.70178e-10	2448	aug3.g23632	U4/U6.U5 tri-snRNP-associated protein 1-like
LOC107454961	2.64351e-14	-0.459307	0.995	0.994	4.7882e-10	4542	aug3.g24969	pre-rRNA-processing protein TSR1 homolog
LOC107445821	3.0389e-14	0.355742	0.606	0.193	5.50436e-10	343	aug3.g18773	28S ribosomal protein S36, mitochondrial-like, transcript variant X3
LOC107450555	3.24531e-14	-0.434058	0.995	1	5.87824e-10	4786	aug3.g3421	pescadillo homolog
LOC107449604	4.24101e-14	-0.543055	0.991	0.977	7.68174e-10	2697	aug3.g20840	myb-binding protein 1A-like
LOC107455162	4.59828e-14	-0.491774	1	1	8.32887e-10	3170	aug3.g6880	heterogeneous nuclear ribonucleoprotein 27C-like, transcript variant X1
LOC107455849	5.07152e-14	0.472343	0.944	0.649	9.18604e-10	1352	aug3.g8083	NADH dehydrogenase [ubiquinone] 1 beta subcomplex subunit 2, mitochondrial
LOC107439203	5.12394e-14	-0.56476	0.931	0.971	9.281e-10	1955	aug3.g13623	eIF-2-alpha kinase activator GCN1
LOC107436683	5.53647e-14	0.440424	1	0.971	1.00282e-09	4131	aug3.g26069	mitochondrial import inner membrane translocase subunit Tim17-B-like
LOC107437688	6.08736e-14	0.382084	0.546	0.152	1.1026e-09	294		uncharacterized LOC107437688
LOC107440922	6.32312e-14	0.38614	1	0.982	1.14531e-09	5039	aug3.g25510	cofilin/actin-depolymerizing factor homolog
LOC107447119	6.80843e-14	0.450372	0.745	0.304	1.23321e-09	576		uncharacterized LOC107447119
LOC107444557	7.17848e-14	-0.60334	0.903	0.936	1.30024e-09	1399	aug3.g746	serine/threonine-protein kinase 31
LOC107437386	7.79324e-14	-0.461493	0.986	0.988	1.41159e-09	3022	aug3.g9515	far upstream element-binding protein 1
LOC107443156	9.83474e-14	0.529598	0.931	0.62	1.78137e-09	1424	aug3.g17056	uncharacterized LOC107443156, transcript variant X1
LOC107447518	1.18859e-13	-0.577745	0.954	0.988	2.15289e-09	2021	aug3.g9271	U3 small nucleolar RNA-associated protein 14 homolog B-like
LOC107448168	1.40701e-13	0.547239	0.926	0.649	2.54852e-09	1459	aug3.g20173	uncharacterized LOC107448168, transcript variant X1
LOC107448941	1.63389e-13	0.510018	0.815	0.444	2.95946e-09	768		uncharacterized LOC107448941
LOC107438493	1.72006e-13	0.442049	0.667	0.257	3.11554e-09	463	aug3.g13135	uncharacterized LOC107438493
LOC107454300	1.7491e-13	-0.476564	0.995	1	3.16815e-09	4635	aug3.g6161	importin-5
LOC107439986	1.78543e-13	-0.455632	0.995	0.988	3.23396e-09	3307	aug3.g14169	dnaJ homolog subfamily A member 2
LOC107439873	1.95853e-13	-0.43085	1	0.994	3.54748e-09	3579	aug3.g7148	lamin Dm0
LOC107448850	1.95853e-13	0.263515	1	1	3.54748e-09	34635	aug3.g2449	40S ribosomal protein S9
LOC107444231	2.00509e-13	-0.546	0.963	0.988	3.63182e-09	2174	aug3.g17710	probable splicing factor, arginine/serine-rich 7
LOC107453594	2.19885e-13	0.461751	1	0.854	3.98278e-09	2558	aug3.g5598	histidine triad nucleotide-binding protein 1-like
LOC107454406	2.29644e-13	0.493072	0.977	0.819	4.15954e-09	1934	aug3.g24031	cytochrome c oxidase subunit NDUFA4
LOC107445297	2.29994e-13	-0.397355	1	0.994	4.16588e-09	5298	aug3.g18446	Y-box factor homolog
LOC107455592	2.36387e-13	0.465643	0.847	0.526	4.28168e-09	919	aug3.g7887	immediate early response 3-interacting protein 1-like
LOC107439787	2.46083e-13	0.4504	0.991	0.947	4.4573e-09	3710		elongin-C-like
LOC107450720	2.5528e-13	0.432382	0.991	0.813	4.62389e-09	1633	aug3.g21287	enhancer of rudimentary homolog, transcript variant X1
LOC107437922	2.75311e-13	0.860201	0.995	0.936	4.98672e-09	13163	aug3.g12662	histone H1B-like
LOC107454498	2.97211e-13	0.496972	0.898	0.637	5.38338e-09	1200	aug3.g6323	peptidyl-prolyl cis-trans isomerase NIMA-interacting 4
LOC107453793	3.02025e-13	-0.402151	1	1	5.47058e-09	6194	aug3.g23875	serine/arginine-rich splicing factor 5, transcript variant X2
LOC107448450	3.49471e-13	0.493775	0.852	0.474	6.32996e-09	890	aug3.g2212	mitochondrial import inner membrane translocase subunit Tim9-like, transcript variant X1
LOC107445841	3.90956e-13	-0.554057	0.898	0.924	7.08139e-09	2180	aug3.g18790	cinnamoyl-CoA reductase 2
LOC107451679	4.04202e-13	-0.584918	0.986	0.994	7.32131e-09	2922	aug3.g4211	apoptotic chromatin condensation inducer in the nucleus-like
LOC107454176	4.24949e-13	0.438667	0.852	0.439	7.6971e-09	800	aug3.g23971	signal recognition particle 9 kDa protein
LOC107447902	5.58776e-13	0.499323	0.745	0.38	1.01211e-08	608	aug3.g1980	uncharacterized LOC107447902
LOC107450906	6.08168e-13	0.458195	0.898	0.532	1.10158e-08	978	aug3.g10534	PHD finger-like domain-containing protein 5A
LOC107447243	6.32475e-13	-0.434547	0.991	1	1.1456e-08	3835	aug3.g1665	UV excision repair protein RAD23 homolog B
LOC107440346	6.58412e-13	-0.467877	0.986	0.994	1.19258e-08	4362	aug3.g14469	importin-4
LOC107442565	8.96116e-13	0.433937	0.884	0.532	1.62313e-08	965	aug3.g16667	39S ribosomal protein L52, mitochondrial
LOC107446640	1.07146e-12	-0.421102	1	1	1.94073e-08	6262	aug3.g19318	T-complex protein 1 subunit theta, transcript variant X1
LOC107455868	1.43988e-12	0.430229	0.968	0.708	2.60805e-08	1377	aug3.g10909	signal recognition particle 19 kDa protein-like
LOC107441846	1.45775e-12	-0.388395	1	0.994	2.64042e-08	4103	aug3.g16190	casein kinase II subunit alpha-like
LOC107444010	1.494e-12	0.405901	0.718	0.316	2.70608e-08	528	aug3.g10006	LYR motif-containing protein 4-like
LOC107442391	1.60404e-12	-0.381741	1	1	2.90539e-08	4876	aug3.g27622	ruvB-like 1, transcript variant X1
LOC107449138	1.92071e-12	-0.564337	0.935	0.959	3.47898e-08	1765	aug3.g10428	GRB10-interacting GYF protein 2
LOC107436525	2.29437e-12	-0.346384	1	1	4.15579e-08	7667	aug3.g24807	T-complex protein 1 subunit eta-like
LOC107457205	2.54739e-12	-0.441798	1	0.988	4.61408e-08	3172	aug3.g9191	hepatoma-derived growth factor-related protein 2
LOC107446555	2.54799e-12	-0.548432	0.889	0.959	4.61518e-08	1551	aug3.g1377	probable ATP-dependent RNA helicase DDX23
LOC107456663	2.60478e-12	-0.576105	0.764	0.836	4.71803e-08	944	aug3.g8742	histidine decarboxylase-like, transcript variant X1
LOC107441285	2.6151e-12	0.461583	0.963	0.69	4.73673e-08	1305	aug3.g15781	transcription elongation factor SPT4-like
LOC107457305	3.17937e-12	-0.386283	1	1	5.75879e-08	6506	aug3.g11053	heterogeneous nuclear ribonucleoprotein L-like
LOC107451755	3.31416e-12	-0.478667	0.968	0.971	6.00293e-08	2026	aug3.g4272	general transcription factor IIF subunit 1-like
LOC107436790	3.61784e-12	0.37262	0.699	0.275	6.55299e-08	629	aug3.g11826	ornithine decarboxylase antizyme 1-like
LOC107440725	5.03487e-12	-0.315739	1	1	9.11967e-08	8526	aug3.g14777	T-complex protein 1 subunit zeta
LOC107443535	5.71614e-12	0.396026	0.986	0.801	1.03537e-07	1779	aug3.g9223	uncharacterized LOC107443535
LOC107437818	6.35675e-12	0.456263	0.824	0.427	1.1514e-07	791	aug3.g12593	coiled-coil-helix-coiled-coil-helix domain-containing protein 5-like
LOC107436332	6.57425e-12	0.371812	0.995	0.988	1.19079e-07	3657	aug3.g26013	LIM domain-binding protein 2, transcript variant X3
LOC110282875	7.20704e-12	0.491957	0.926	0.678	1.30541e-07	1307	aug3.g22400	prefoldin subunit 1-like
LOC107453797	9.23486e-12	-0.588018	0.602	0.731	1.67271e-07	638	aug3.g23900	pre-mRNA-processing factor 6
LOC107455908	9.25084e-12	0.432356	0.977	0.69	1.6756e-07	1436	aug3.g8131	ATPase inhibitor A, mitochondrial-like, transcript variant X2
LOC107436940	9.41501e-12	0.378694	0.806	0.415	1.70534e-07	711	aug3.g7033	NADH dehydrogenase [ubiquinone] iron-sulfur protein 6, mitochondrial
LOC107439030	9.76796e-12	-0.379733	0.995	0.994	1.76927e-07	4156	aug3.g13520	eukaryotic translation initiation factor 2 subunit 1-like
LOC107445525	1.01475e-11	0.416947	1	0.977	1.83802e-07	4492	aug3.g7506	protein LLP homolog, transcript variant X1
LOC107436478	1.12428e-11	0.365251	0.639	0.234	2.03641e-07	453	aug3.g11584	uncharacterized LOC107436478
LOC107439617	1.22568e-11	-0.483051	0.866	0.924	2.22007e-07	1258	aug3.g23247	heterogeneous nuclear ribonucleoprotein K-like
LOC107441702	1.26469e-11	0.420516	0.912	0.632	2.29073e-07	1095	aug3.g27415	acyl carrier protein, mitochondrial-like
LOC107455806	1.267e-11	0.92655	0.884	0.579	2.29491e-07	2769	aug3.g22587	60S ribosomal protein L30
LOC107436202	1.29181e-11	0.400544	0.875	0.45	2.33985e-07	836	aug3.g11380	U6 snRNA-associated Sm-like protein LSm5
LOC107454686	1.72835e-11	-0.470007	0.954	0.965	3.13055e-07	2191	aug3.g6456	26S proteasome non-ATPase regulatory subunit 12-like, transcript variant X1
LOC107438957	1.74741e-11	-0.569287	0.981	0.988	3.16509e-07	2798	aug3.g13486	uncharacterized LOC107438957, transcript variant X1
LOC107443494	1.8204e-11	0.273654	1	1	3.29729e-07	22286	aug3.g27985	prostaglandin E synthase 3, transcript variant X2
LOC107442732	1.86669e-11	-0.280683	1	1	3.38114e-07	10702	aug3.g27729	heterogeneous nuclear ribonucleoprotein A1, A2/B1 homolog, transcript variant X1
LOC107451224	1.96892e-11	0.349943	1	0.994	3.5663e-07	11604		60S ribosomal protein L15-like
LOC107450595	1.97295e-11	0.298703	0.662	0.257	3.57361e-07	368		uncharacterized LOC107450595
LOC107445326	2.01886e-11	-0.42697	0.995	0.982	3.65677e-07	3007	aug3.g1006	RNA-binding protein 34, transcript variant X1
LOC107442184	2.30035e-11	0.417792	0.875	0.474	4.16662e-07	850	aug3.g16406	U6 snRNA-associated Sm-like protein LSm8
LOC107444554	2.31686e-11	-0.317373	1	1	4.19653e-07	7506	aug3.g757	ELAV-like protein 1 pseudogene, transcript variant X1
LOC107444608	2.40348e-11	0.416822	0.88	0.556	4.35342e-07	898	aug3.g787	protein FAM136A-like
LOC107449282	2.58422e-11	-0.676726	0.94	0.959	4.68079e-07	2744	aug3.g20669	uncharacterized LOC107449282
LOC107444358	2.60006e-11	0.454546	0.954	0.825	4.70948e-07	1838	aug3.g17813	mediator of RNA polymerase II transcription subunit 22-like, transcript variant X1
LOC107455112	2.68267e-11	0.338264	1	0.982	4.85912e-07	8955	aug3.g6813	nucleoside diphosphate kinase-like
LOC107445457	2.80454e-11	-0.534719	0.949	0.959	5.07987e-07	2269	aug3.g12177	chromatin-remodeling complex ATPase chain Iswi
LOC107440638	2.87278e-11	0.326069	1	0.994	5.20346e-07	7497		calmodulin
LOC107451984	3.14525e-11	0.39396	0.94	0.754	5.697e-07	1597	aug3.g4447	macrophage migration inhibitory factor homolog
LOC107448113	3.16892e-11	-0.479156	0.972	0.947	5.73987e-07	2041	aug3.g20136	RNA-binding protein 28, transcript variant X1
LOC107447120	3.54762e-11	-0.444153	0.991	0.994	6.42581e-07	3444	aug3.g19560	lysine--tRNA ligase
LOC107439343	3.81241e-11	-0.542876	0.926	0.93	6.90542e-07	1912	aug3.g13703	ESF1 homolog
LOC107439856	4.00126e-11	0.321698	0.773	0.327	7.24748e-07	571	aug3.g14106	mitochondrial import inner membrane translocase subunit tim16-B-like
LOC107446261	4.50695e-11	0.417266	0.824	0.45	8.16345e-07	814	aug3.g19046	U6 snRNA-associated Sm-like protein LSm6, transcript variant X2
LOC107439902	4.58386e-11	-0.470615	0.995	0.994	8.30274e-07	4804	aug3.g26922	polyubiquitin-C, transcript variant X1
LOC107438904	4.62637e-11	-0.436625	0.995	0.994	8.37974e-07	3282	aug3.g13450	zinc finger CCCH domain-containing protein 15
LOC107450425	4.71256e-11	-0.377417	1	0.982	8.53586e-07	4021	aug3.g3317	serine/threonine-protein phosphatase PP1-gamma catalytic subunit
LOC107445353	5.19611e-11	-0.591727	0.773	0.86	9.41172e-07	1216	aug3.g1028	peptidyl-prolyl cis-trans isomerase G, transcript variant X1
LOC107450860	5.59341e-11	-0.490371	0.972	0.965	1.01314e-06	2250	aug3.g3645	26S proteasome non-ATPase regulatory subunit 1
LOC107437367	5.87827e-11	-0.288165	1	1	1.06473e-06	14419	aug3.g12249	H/ACA ribonucleoprotein complex subunit 4
LOC107450754	6.18629e-11	-0.504741	0.889	0.912	1.12052e-06	2859	aug3.g3591	glycerol-3-phosphate dehydrogenase [NAD(+)], cytoplasmic-like, transcript variant X2
LOC107444456	6.28757e-11	-0.474466	0.991	0.994	1.13887e-06	3727	aug3.g10048	transitional endoplasmic reticulum ATPase, transcript variant X2
LOC107441093	6.88919e-11	-0.401939	0.981	0.971	1.24784e-06	2520	aug3.g15026	26S protease regulatory subunit 7
LOC107456407	6.93325e-11	0.254763	1	1	1.25582e-06	30889	aug3.g25228	40S ribosomal protein S10b-like
LOC107441924	7.15546e-11	-0.549266	0.926	0.912	1.29607e-06	1557	aug3.g27478	uncharacterized protein DDB_G0287625-like
LOC107447827	7.45959e-11	-0.473243	1	1	1.35115e-06	5991	aug3.g1937	importin subunit beta-1-like
LOC107446680	7.73011e-11	0.398092	0.917	0.62	1.40016e-06	1220	aug3.g1441	uncharacterized protein C9orf85
LOC107454735	7.89651e-11	0.41002	1	0.871	1.4303e-06	2930	aug3.g6497	superoxide dismutase [Cu-Zn]-like
LOC107445615	7.98047e-11	-0.493163	0.764	0.807	1.4455e-06	918	aug3.g18644	exosome complex exonuclease RRP44
LOC107436974	8.16661e-11	-0.520627	0.824	0.912	1.47922e-06	1184	aug3.g26142	recombination repair protein 1
LOC107437503	8.63209e-11	-0.272532	1	1	1.56353e-06	9138	aug3.g12370	pentatricopeptide repeat-containing protein 2, mitochondrial-like, transcript variant X1
LOC107439253	9.5082e-11	-0.538272	0.94	0.953	1.72222e-06	1787	aug3.g7140	CCAAT/enhancer-binding protein zeta-like
LOC107455469	1.02165e-10	0.481205	0.94	0.836	1.85052e-06	2033	aug3.g25059	thioredoxin
LOC107454991	1.04457e-10	-0.46463	0.977	0.982	1.89203e-06	2787	aug3.g6716	dnaJ homolog subfamily A member 1-like
LOC107456014	1.24964e-10	0.405554	0.94	0.667	2.26347e-06	1180	aug3.g8227	U6 snRNA-associated Sm-like protein LSm2, transcript variant X2
LOC107455132	1.25968e-10	-0.466693	1	0.988	2.28166e-06	3500	aug3.g6843	bromodomain adjacent to zinc finger domain protein 1A, transcript variant X1
LOC107441414	1.28153e-10	-0.445692	0.935	0.953	2.32124e-06	1682	aug3.g27281	sister chromatid cohesion protein PDS5 homolog B, transcript variant X2
LOC107444721	1.44862e-10	0.426675	0.903	0.713	2.62388e-06	1384	aug3.g18050	prefoldin subunit 4-like
LOC107452175	2.15227e-10	-0.279326	1	1	3.8984e-06	13771	aug3.g4569	T-complex protein 1 subunit epsilon-like
LOC107457204	2.20859e-10	0.456028	0.843	0.497	4.00042e-06	898	aug3.g9190	coiled-coil domain-containing protein 58
LOC107443526	2.32515e-10	-0.375257	1	1	4.21154e-06	5433	aug3.g17291	glutamate-rich WD repeat-containing protein 1
LOC107444945	2.39519e-10	-0.67286	1	1	4.33841e-06	36740	aug3.g876	heat shock protein 83
LOC107450227	2.47011e-10	-0.492473	0.87	0.895	4.47412e-06	1241		serine/threonine-protein kinase PLK1
LOC107443584	2.54965e-10	0.338809	0.81	0.456	4.61819e-06	670	aug3.g17339	cyclin-dependent kinase 2-associated protein 1
LOC107440832	2.6645e-10	0.418242	0.894	0.602	4.82621e-06	1033	aug3.g14856	uncharacterized LOC107440832
LOC107453416	2.6799e-10	0.269523	0.458	0.135	4.8541e-06	244	aug3.g5469	reactive oxygen species modulator 1-like, transcript variant X1
LOC107455963	2.81781e-10	-0.664779	0.565	0.684	5.1039e-06	670	aug3.g8197	serine/arginine repetitive matrix protein 2, transcript variant X12
LOC107454891	2.94854e-10	-0.547757	0.806	0.854	5.34069e-06	974	aug3.g6653	cell division cycle 5-like protein
LOC107448239	3.00344e-10	0.379452	0.847	0.509	5.44013e-06	787	aug3.g2144	protein FAM32A-like
LOC107438587	3.02942e-10	0.280487	0.528	0.175	5.48719e-06	258	aug3.g13211	uncharacterized LOC107438587
LOC107443827	3.03248e-10	-0.418276	0.963	0.971	5.49273e-06	2578	aug3.g17491	ubiquitin carboxyl-terminal hydrolase 10
LOC107438179	3.10722e-10	-0.536038	0.898	0.912	5.62811e-06	1264	aug3.g12888	DNA ligase 1-like
LOC107441637	3.26288e-10	-0.485601	0.875	0.906	5.91006e-06	1099	aug3.g27382	DNA replication licensing factor mcm4-A
LOC107446257	3.62226e-10	0.431897	0.954	0.725	6.56099e-06	1536	aug3.g19043	prefoldin subunit 5
LOC107448913	3.63186e-10	-0.393874	1	1	6.57838e-06	4396		uncharacterized LOC107448913
LOC107457145	3.74011e-10	-0.411958	0.995	1	6.77447e-06	4185	aug3.g9124	adenosylhomocysteinase A
LOC107456946	3.75908e-10	-0.43904	0.718	0.825	6.80882e-06	898	aug3.g24338	zinc finger CCCH domain-containing protein 13-like
LOC107437231	4.26749e-10	-0.385724	1	0.994	7.72971e-06	4552	aug3.g12136	tRNA (cytosine(34)-C(5))-methyltransferase, transcript variant X1
LOC107440855	4.40595e-10	-0.483124	0.94	0.953	7.9805e-06	1880	aug3.g27184	apoptosis inhibitor 5
LOC107448893	4.41998e-10	-0.279347	1	1	8.0059e-06	9843	aug3.g15380	serine/arginine-rich splicing factor 2-like, transcript variant X2
LOC107444237	5.15419e-10	0.310592	0.644	0.275	9.33578e-06	397	aug3.g17712	uncharacterized LOC107444237
LOC107457362	5.30241e-10	-0.467428	0.921	0.959	9.60425e-06	1812	aug3.g25885	26S proteasome non-ATPase regulatory subunit 6, transcript variant X1
LOC107449658	6.23221e-10	-0.437572	0.986	0.988	1.12884e-05	2922	aug3.g2881	probable ATP-dependent RNA helicase DDX56
LOC107449352	6.26869e-10	-0.341311	0.991	1	1.13545e-05	3468	aug3.g20708	nucleolysin TIA-1-like
LOC107439350	6.54919e-10	-0.544356	0.907	0.901	1.18625e-05	1767	aug3.g13706	protein 60A-like
LOC107440128	7.54385e-10	0.329087	1	1	1.36642e-05	10900	aug3.g14286	elongation factor 1-beta
LOC107446072	7.63858e-10	0.288598	0.708	0.287	1.38358e-05	449	aug3.g25625	UPF0389 protein CG9231-like
LOC107447577	7.78001e-10	-0.460918	0.958	0.971	1.40919e-05	2517	aug3.g19848	ATP-dependent RNA helicase DDX3Y, transcript variant X1
LOC107443587	8.40686e-10	0.413745	0.926	0.696	1.52273e-05	1357	aug3.g17342	splicing factor 3B subunit 6-like protein, transcript variant X1
LOC107457417	8.73507e-10	0.368276	0.773	0.421	1.58218e-05	667	aug3.g11150	uncharacterized LOC107457417
LOC107445067	9.74499e-10	-0.440758	0.995	0.971	1.76511e-05	3378	aug3.g10093	armadillo segment polarity protein-like, transcript variant X1
LOC107450604	1.0058e-09	-0.446803	1	1	1.82181e-05	6352	aug3.g21245	tubulin alpha chain-like
LOC107451806	1.04098e-09	-0.285595	1	1	1.88553e-05	7532	aug3.g21603	complement component 1 Q subcomponent-binding protein, mitochondrial
LOC107456817	1.07426e-09	-0.413826	0.995	0.982	1.94581e-05	3941	aug3.g25309	putative ATP-dependent RNA helicase me31b
LOC107441207	1.07984e-09	-0.425036	0.968	0.971	1.95591e-05	2308	aug3.g27219	protein SDA1 homolog
LOC107450943	1.11558e-09	0.279864	0.528	0.193	2.02065e-05	277	aug3.g3715	protein dpy-30 homolog
LOC107456071	1.1505e-09	-0.45882	0.995	0.971	2.0839e-05	3096	aug3.g25167	probable ATP-dependent RNA helicase DDX46, transcript variant X1
LOC107456619	1.19921e-09	0.367278	0.755	0.409	2.17212e-05	617	aug3.g8703	HIG1 domain family member 2A, mitochondrial
LOC107450820	1.23127e-09	-0.456029	0.968	0.965	2.23021e-05	2013	aug3.g15635	aconitate hydratase, mitochondrial
LOC107455547	1.273e-09	0.34555	0.986	0.918	2.30578e-05	2405	aug3.g7848	dnaJ homolog subfamily C member 8-like
LOC107453030	1.44914e-09	-0.424555	0.995	0.988	2.62483e-05	4286	aug3.g9317	SAFB-like transcription modulator, transcript variant X1
LOC107445486	1.54266e-09	0.372721	0.912	0.573	2.79421e-05	1070	aug3.g18586	coiled-coil domain-containing protein 86
LOC107438310	1.59828e-09	-0.445258	0.903	0.924	2.89496e-05	1539	aug3.g25440	bifunctional lysine-specific demethylase and histidyl-hydroxylase NO66, transcript variant X2
LOC107438751	1.61192e-09	0.38441	0.968	0.842	2.91966e-05	1829	aug3.g13339	probable 28S ribosomal protein S16, mitochondrial, transcript variant X2
LOC107453405	1.62271e-09	0.344443	1	0.942	2.93921e-05	3262	aug3.g5453	ribosomal RNA small subunit methyltransferase NEP1-like
LOC107451034	1.6541e-09	0.286969	0.556	0.205	2.99608e-05	311	aug3.g213	uncharacterized LOC107451034, transcript variant X1
LOC107436419	1.69179e-09	-0.473551	0.917	0.924	3.06435e-05	1472	aug3.g11547	nuclear receptor coactivator 5-like
LOC107445470	1.81677e-09	0.422697	0.903	0.602	3.29071e-05	1185	aug3.g18589	ATP synthase-coupling factor 6, mitochondrial
LOC107454418	1.92313e-09	-0.281869	1	1	3.48337e-05	6385	aug3.g6247	protein arginine N-methyltransferase 1-like, transcript variant X2
LOC107452221	2.12331e-09	0.322476	0.875	0.567	3.84596e-05	854	aug3.g4597	U6 snRNA-associated Sm-like protein LSm3
LOC107449552	2.22275e-09	-0.473573	0.954	0.959	4.02607e-05	2469	aug3.g20811	tubulin beta chain, transcript variant X1
LOC107436566	2.43981e-09	-0.466024	0.597	0.731	4.41922e-05	547	aug3.g11667	squamous cell carcinoma antigen recognized by T-cells 3-like
LOC107445094	2.77753e-09	-0.385811	1	0.994	5.03095e-05	5270	aug3.g925	eukaryotic translation initiation factor 5B-like
LOC107443089	2.97659e-09	0.354289	0.792	0.474	5.39149e-05	777	aug3.g7342	MICOS complex subunit Mic10-like
LOC107440469	3.09391e-09	-0.4715	0.819	0.854	5.60401e-05	1060	aug3.g14574	cytosol aminopeptidase
LOC107439585	3.09456e-09	-0.454128	0.968	0.965	5.60518e-05	2261	aug3.g26838	dnaJ homolog subfamily C member 2-like
LOC107447083	3.21337e-09	0.364944	0.861	0.485	5.82038e-05	885	aug3.g19539	RING-box protein 2-like
LOC107445585	3.23137e-09	0.345039	0.787	0.462	5.85299e-05	666	aug3.g1085	NADH dehydrogenase [ubiquinone] iron-sulfur protein 5-like, transcript variant X1
LOC107443110	3.23596e-09	0.328225	0.995	0.936	5.86129e-05	3285	aug3.g27849	protein mago nashi homolog
LOC107457319	3.44848e-09	0.387276	0.94	0.719	6.24624e-05	1316	aug3.g11069	alpha-endosulfine
LOC107454179	3.49726e-09	-0.505003	0.796	0.848	6.33459e-05	1125	aug3.g23973	delta(14)-sterol reductase, transcript variant X1
LOC107443752	3.64468e-09	0.313083	0.699	0.322	6.6016e-05	483	aug3.g525	protein FMC1 homolog
LOC107438420	4.04927e-09	0.355482	0.995	0.871	7.33443e-05	2288	aug3.g9590	ubiquitin-conjugating enzyme E2-24 kDa
LOC107439889	4.41529e-09	0.260105	0.63	0.257	7.99741e-05	393	aug3.g7177	cytochrome c oxidase assembly protein COX16 homolog, mitochondrial-like
LOC107439164	4.57737e-09	-0.444233	0.935	0.93	8.29099e-05	1785	aug3.g25462	myelin expression factor 2, transcript variant X1
LOC107450179	4.72495e-09	0.370714	0.981	0.86	8.5583e-05	2215	aug3.g3179	proteasome maturation protein, transcript variant X1
LOC107455791	4.75769e-09	0.332064	0.769	0.409	8.6176e-05	594	aug3.g8025	MAPK regulated corepressor interacting protein 2, transcript variant X1
LOC107451172	4.7828e-09	-0.328649	1	1	8.66309e-05	4617	aug3.g3850	ATP synthase subunit alpha, mitochondrial, transcript variant X5
LOC107439780	4.86123e-09	0.340365	0.829	0.515	8.80515e-05	802	aug3.g9698	uncharacterized LOC107439780
LOC107449285	4.87585e-09	-0.326837	1	0.994	8.83163e-05	4253	aug3.g12041	ribosomal L1 domain-containing protein 1-like
LOC107455002	5.24521e-09	0.309442	0.588	0.257	9.50065e-05	450	aug3.g6731	vesicle-associated membrane protein 3-like, transcript variant X1
LOC107446697	5.29024e-09	0.401925	0.944	0.749	9.58221e-05	1599	aug3.g1437	28S ribosomal protein S11, mitochondrial-like
*Total numbers of molecules detected in the first single-cell transcriptomes.
**A gene indcluded in the cell-cycle gene list.
